# Supplementary material for: Correlation of language lateralization with resting state hippocampal connectivity in temporal lobe epilepsy patients
Source: PubMed Central journal article supplement (PMC7491274; doi:10.3906/sag-2001-29), 2020-08-26
Supplement: turkjmedsci-50-1350-sup001.pdf [file turkjmedsci-50-1350-sup001.pdf]

| <i>Parameters</i><br><i>Sequences</i> | <i>TE</i><br><i>(ms)</i> | <i>TR</i><br><i>(ms)</i> | <i>Slice</i><br><i>Thickness</i><br><i>(mm)</i> | <i>FOV</i><br><i>(mm)</i> | <i>Slice</i><br><i>number</i> |
|---------------------------------------|--------------------------|--------------------------|-------------------------------------------------|---------------------------|-------------------------------|
| <i>T1w axial</i>                      | 9                        | 360                      | 5                                               | 220*320                   | 20                            |
| <i>T1w sagittal</i>                   | 9                        | 400                      | 5                                               | 240*240                   | 20                            |
| <i>T2w axial</i>                      | 101                      | 3500                     | 3                                               | 230*230                   | 20                            |
| <i>FLAIR axial</i>                    | 90                       | 9000                     | 5                                               | 208*230                   | 20                            |
| <i>FLAIR coronal oblique</i>          | 90                       | 9000                     | 3                                               | 180*230                   | 20                            |
| <i>T1-IR coronal oblique</i>          | 380                      | 3000                     | 1                                               | 190*220                   | 104                           |
| <i>DWI axial (b1000)</i>              | 90                       | 9800                     | 3                                               | 220*220                   | 40                            |
| <i>T1w sagittal</i>                   | 2,5                      | 1900                     | 1                                               | 250*250                   | 176                           |

**\*Note-** Coronal oblique sequences were acquired perpendicular to the long axis of hippocampus
